# Supplementary material for: 4.4 Å Resolution Cryo-EM structure of human mTOR Complex 1
Source: PubMed Central journal article supplement (PMC5205667; doi:10.1007/s13238-016-0346-6), 2016-12-01
Supplement: 13238_2016_346_MOESM3_ESM.pdf [file 13238_2016_346_MOESM3_ESM.pdf]

**Yang\_Table S1**

|                             | mTORC1 complex |
|-----------------------------|----------------|
| CC across whole map volume  | 80.73%         |
| RMS bonds (Å)               | 0.011          |
| RMS angles (°)              | 1.786          |
| Ramachandran statistics (%) |                |
| Most favored                | 80.7           |
| Additional allowed          | 16.9           |
| Generously allowed          | 1.9            |
| Disallowed                  | 0.5            |

Table S1: Statistics after refinement of atomic coordinates for mTORC1 complex.

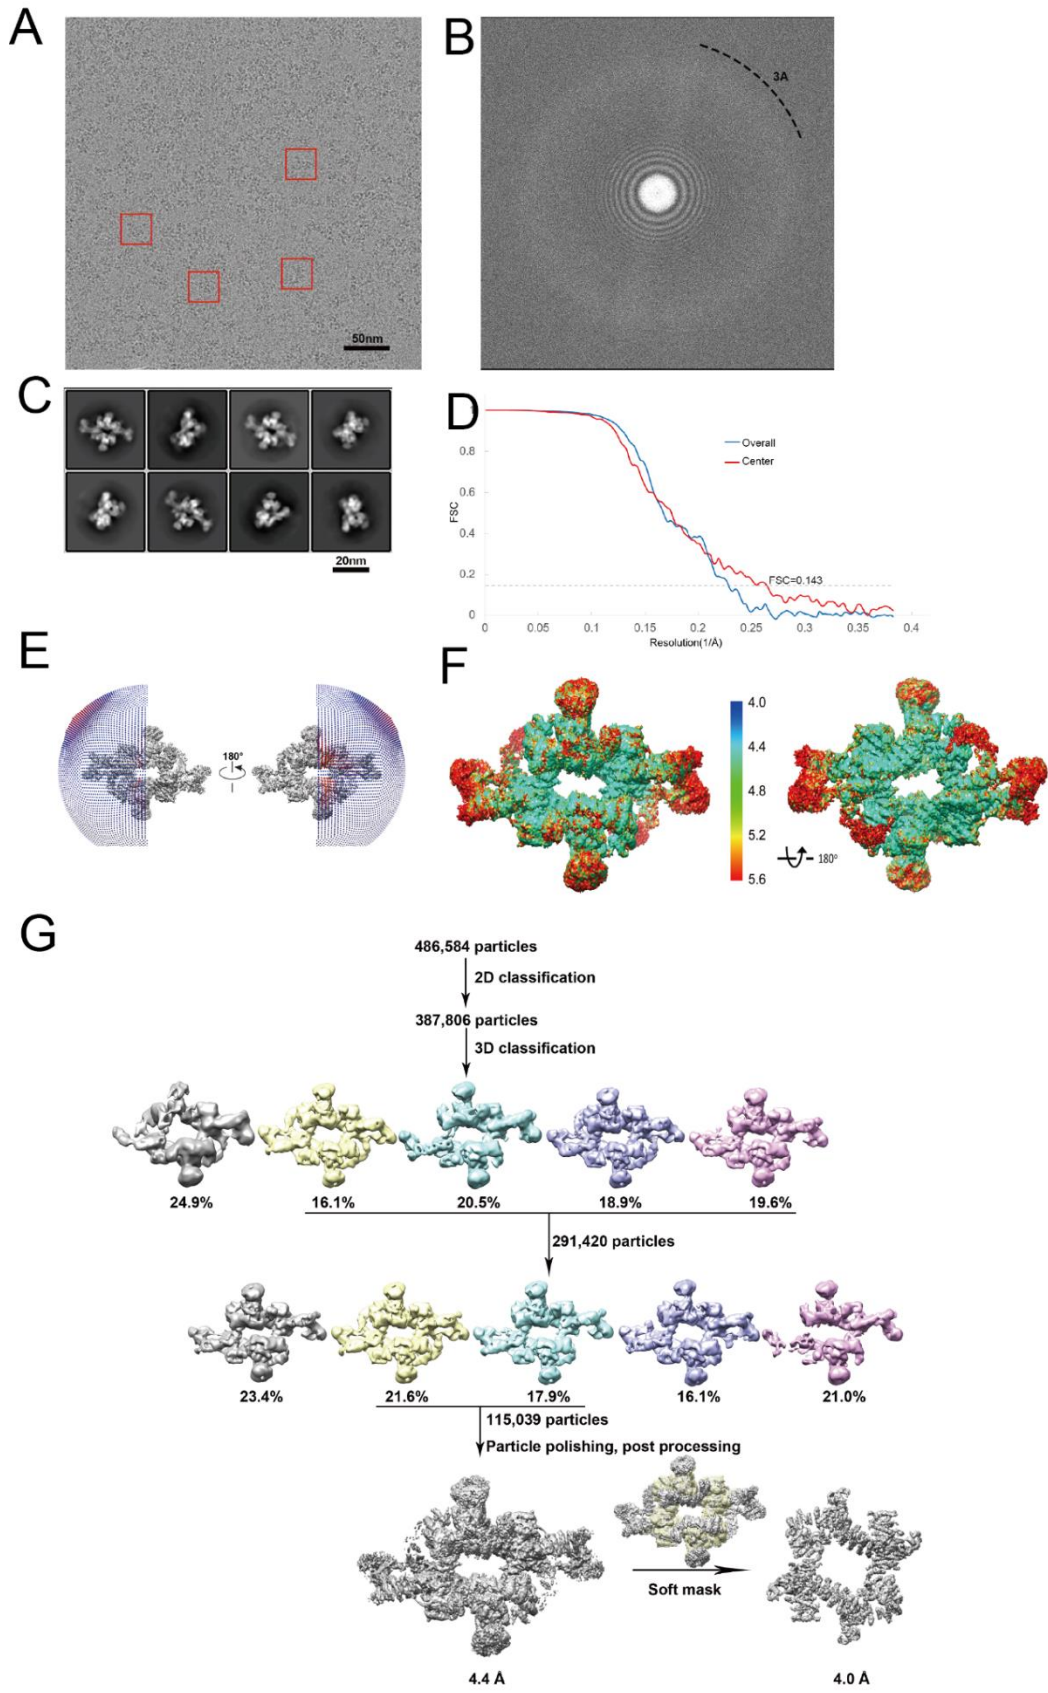

**Figure S1:** (A-B) A representative raw micrograph of cryo-EM mTORC1 (A) and its Fourier transforms (B). (C) Representative 2D Class average of Cryo-EM mTORC1 particles. (D) Angular distribution of cryo-EM mTORC1 used for final structural refinement. (E) FSC curves for the final 3D density map after B-factor sharpening before (red) and after (blue) soft mask application on the central part of mTORC1 in RELION (gold-standard FSC) was corrected by radon phase substitution. (F) Local resolution map of mTORC1 calculated by ResMap. (G) A flow-chart of cryo-EM data processing.

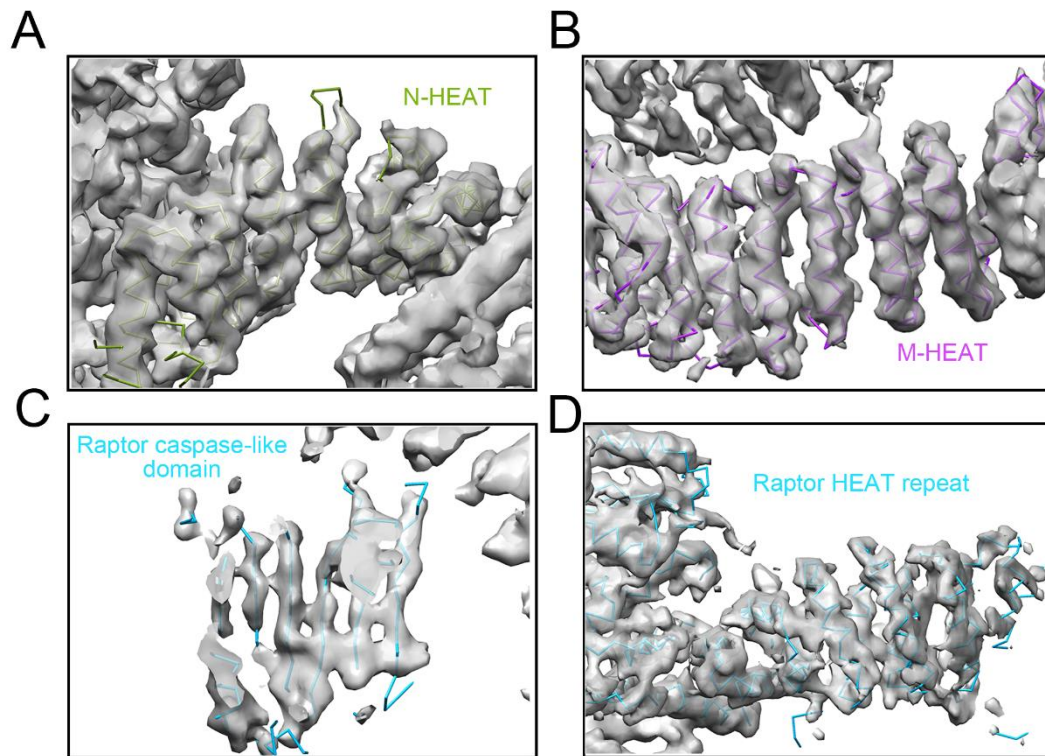

**Figure S2:** (A-D) A representative cryo-EM densities of the N-HEAT region, M-HEAT region, Raptor caspase-like domain,<sup>2</sup> and Raptor HEAT repeat, respectively.

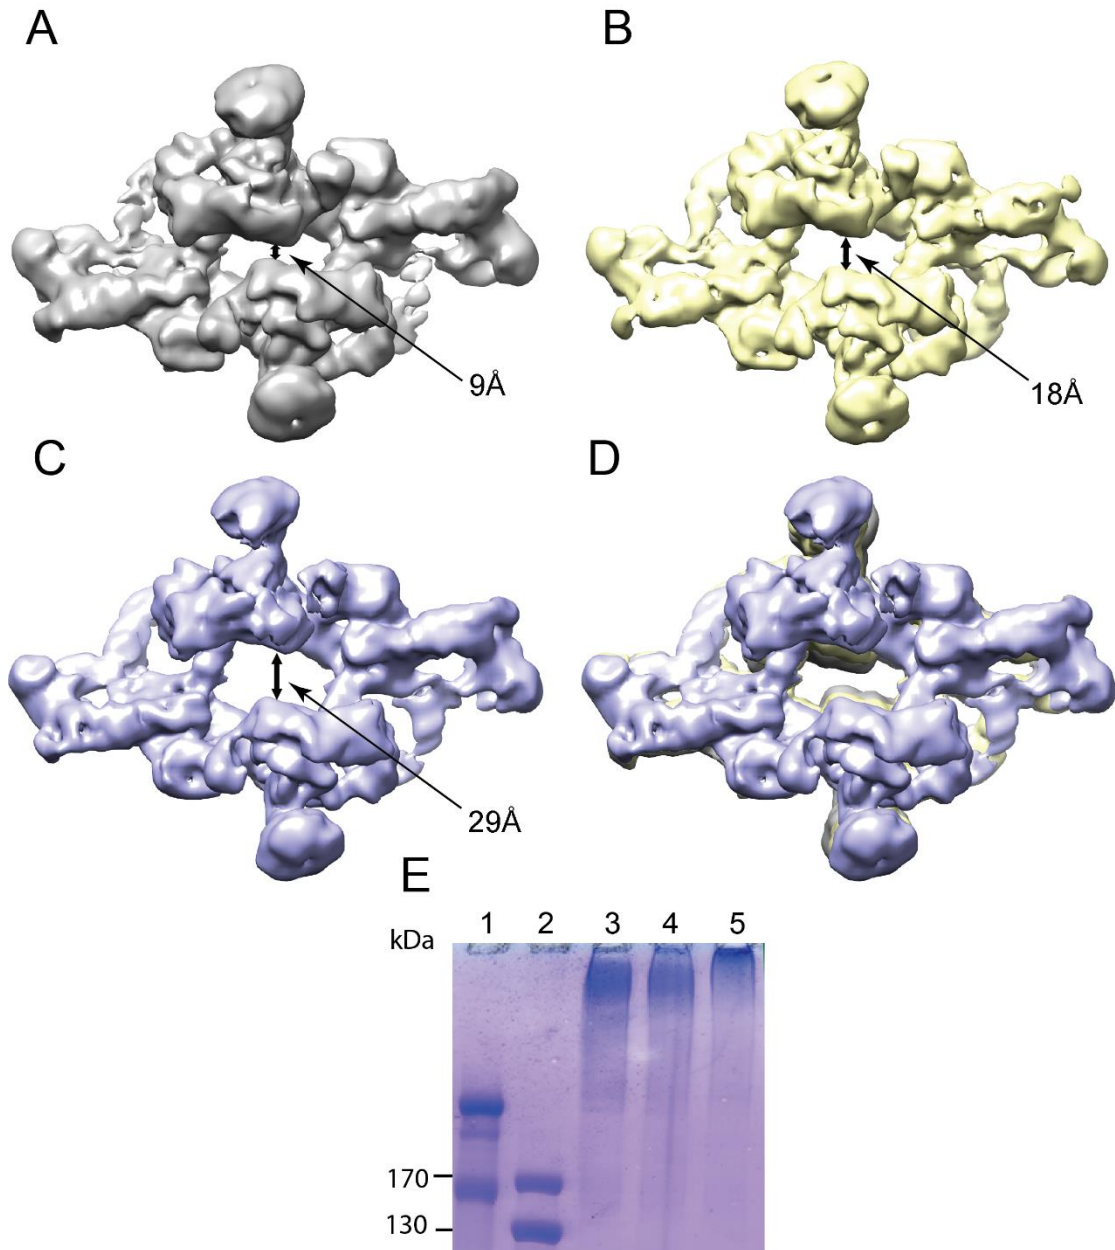

**Figure S3:** (A-C) Three representative classes of mTORC1 during 3D classification. The variation of the indicated di3stance shows conformational dynamics within mTORC1. (D) The superimposition of the three classes of mTORC1. (E) mTORC1 were subjected to SDS-PAGE and stained with Coomassie blue. Lane 1: mTORC1 after gel filtration, lane 2: protein marker; lane3-5: mTORC1 was treated with mild glutaraldehyde gradient fixation. Lane 3 sample was used for cryo-EM.

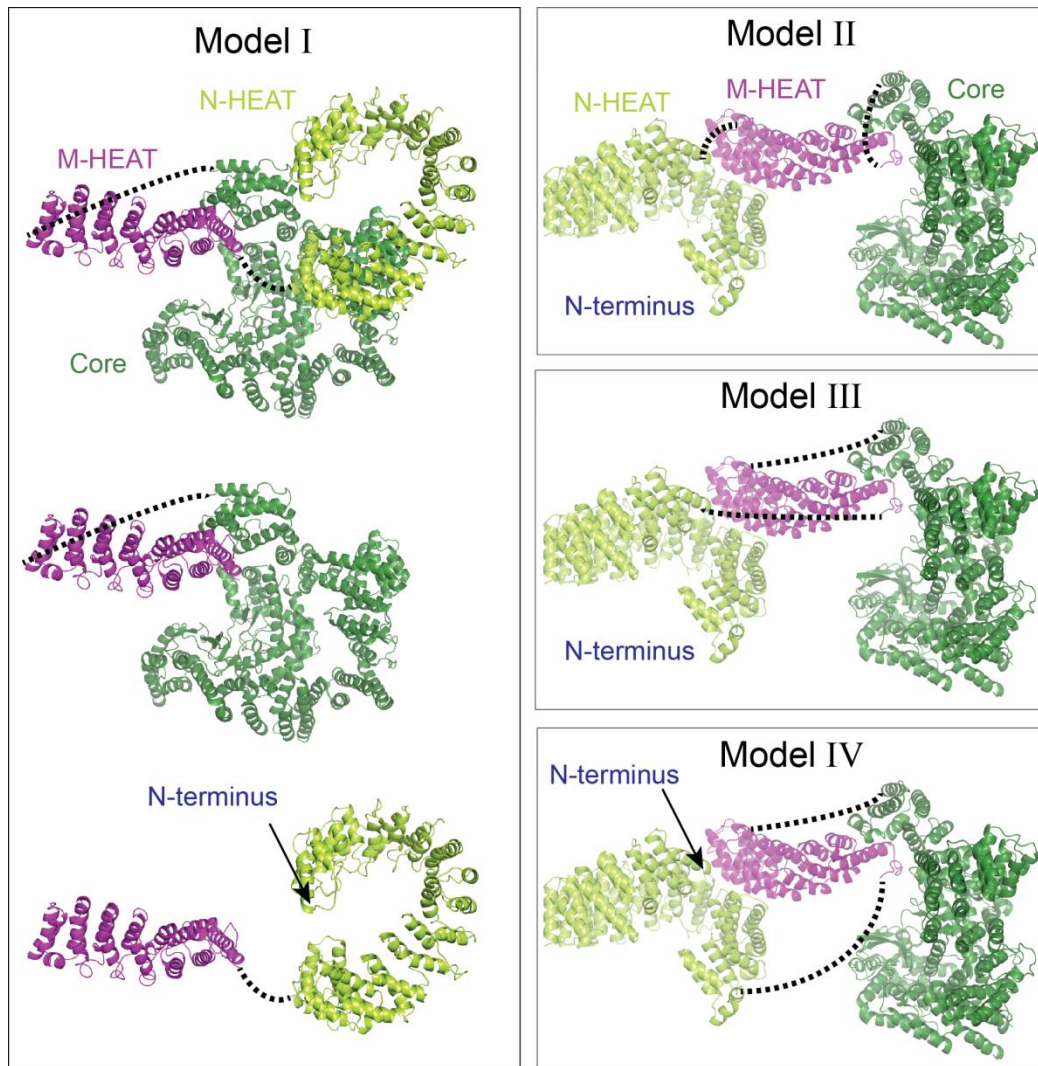

**Figure S4:** Monomeric mTORC1 is shown as ribbon representation for simplicity. The potential density for residues connecting N-HEAT and M-HEAT, and that connecting M-HEAT and Core, are invisible in 4.4 Å resolution map. We therefore built four possible structural models as indicated.

Yang\_Fig S5

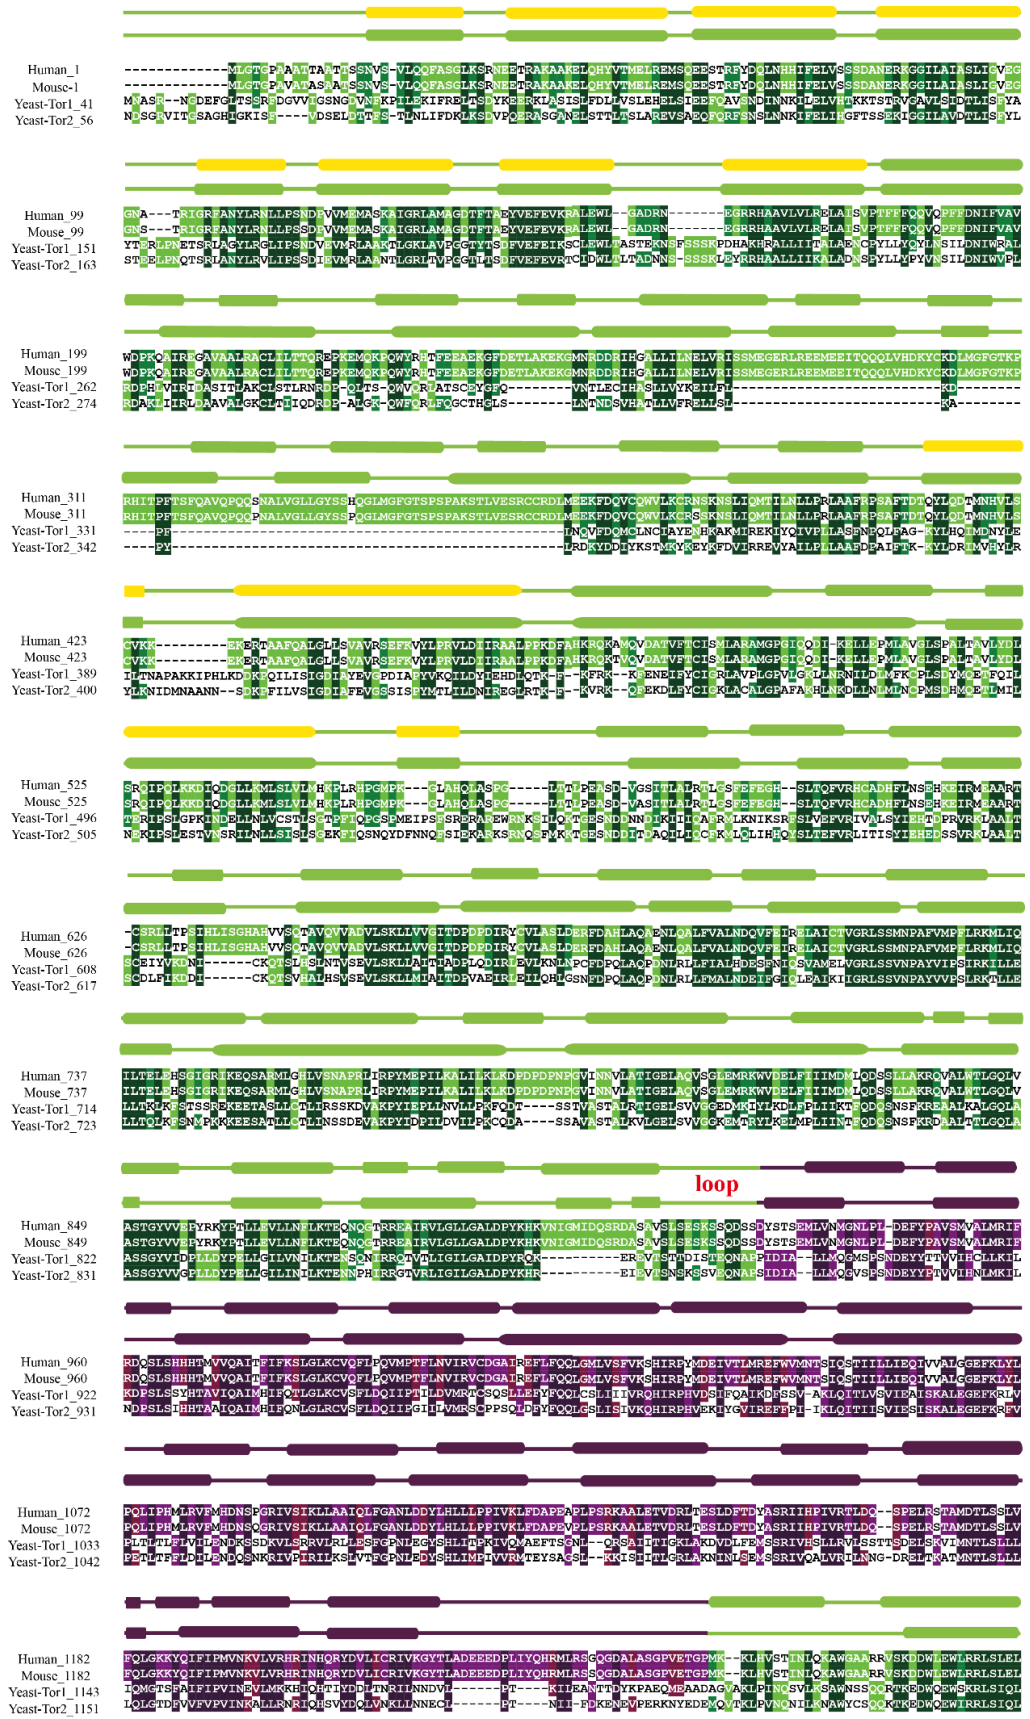





**Figure S5:** The sequence alignment used the sequence of mTOR from human. The upper is secondary structure from our resolved structure (yellow label means the sequence missed in our structure, we use predict result), the lower is predicted secondary structure from [www.predictprotein.org](http://www.predictprotein.org). The numbers of each sequence is shown after the name in each line. N-HEAT and Core domain is shown in green, M-HEAT is shown in purple. Each sequence corresponding number is: Human, GI:1169735; Mouse, GI:227330586; TOR1-Yeast,GI:468739; TOR2-Yeast,GI:298028. The sequences were aligned and colored by Genedoc. The fully conserved residues are in white letters against deep green background, while scored as similar are represented by white letter on green and light green background.

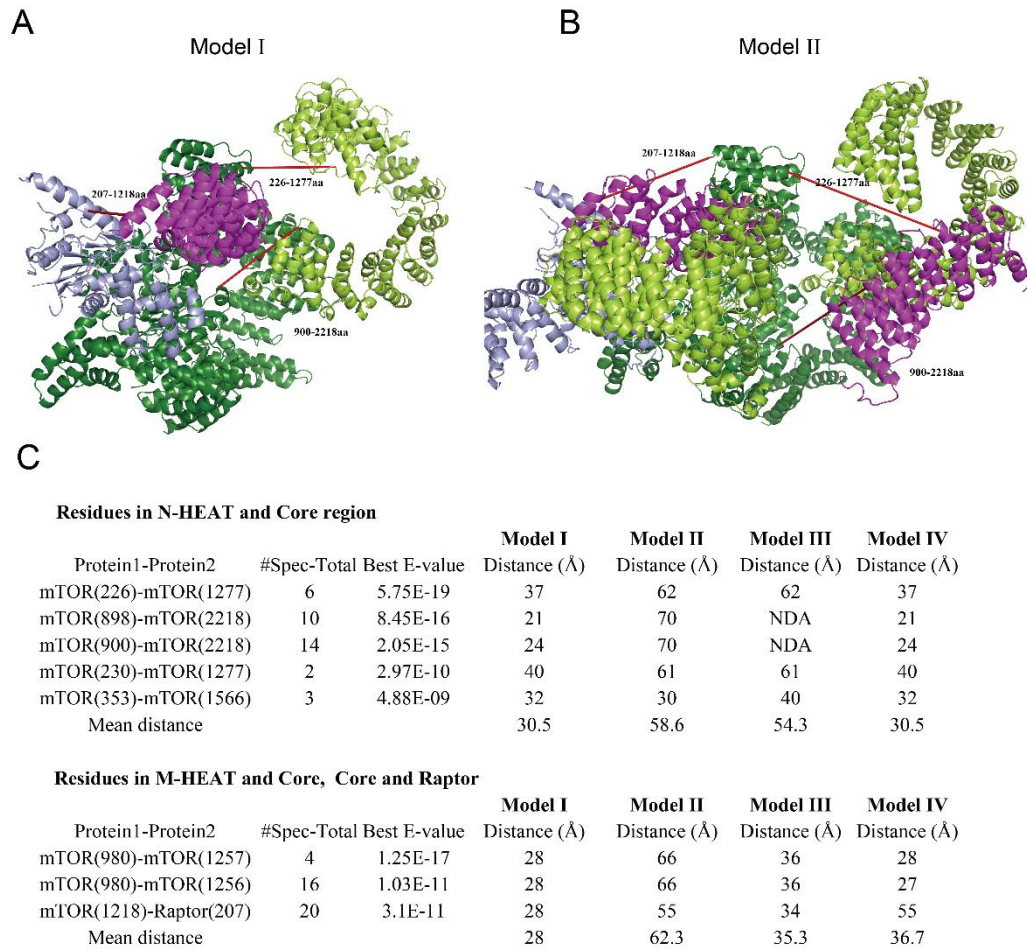

**Figure S6:** (A-B) The key cross linked amino acids in mTORC1 structure. The distance of three pairs of amino acids: mTOR(226)-mTOR(1277), mTOR(900)-mTOR(2218), mTOR(1218) - Raptor(207) are shown in the mTORC1 structure. The distance of model I (A) is shorter than model II (B). (C) The MS data facilitates structural identification of model I of mTORC1 topology in the EM density.

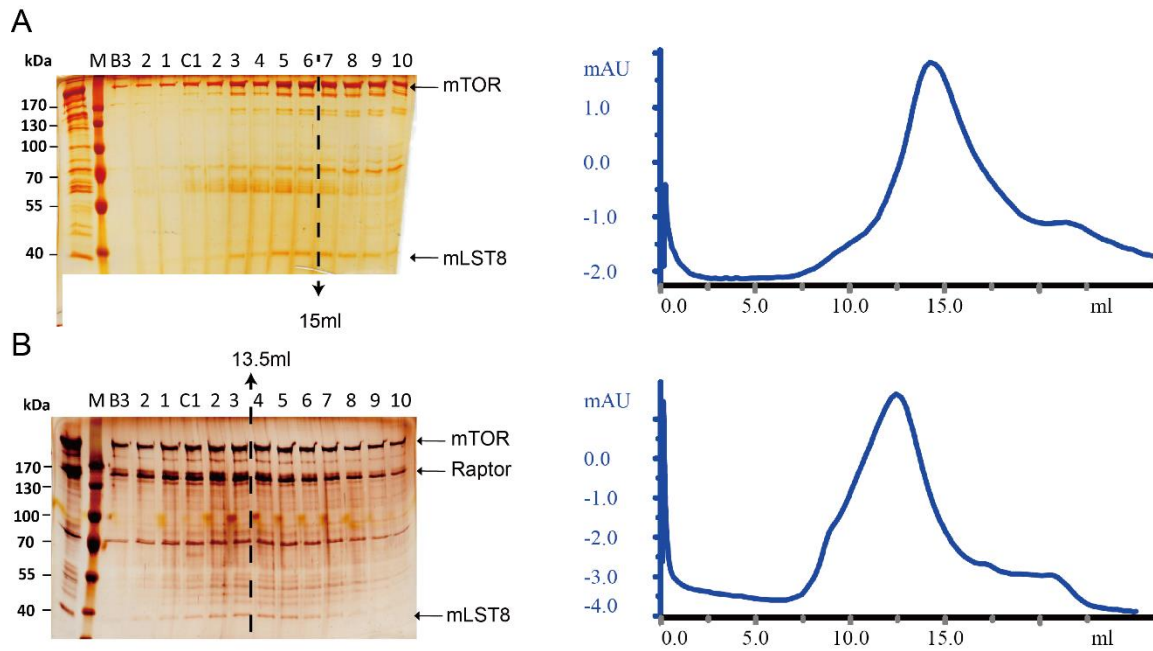

Figure S7: Dimerization of mTOR in solution. Equal amounts of mTOR-mLST8 (A) and mTOR-mLST8-Raptor (B) were applied to Superose 6 (right panel profile) and the peak fractions were subjected to SDS-PAGE for silver staining (left panel). The peak positions for the two complexes are indicated with dashed lines. About 1.5 ml migration difference was observed, suggesting that mTOR-mLST8 forms dimer in solution.
